# Supplementary material for: Tumor-immune profiling of murine syngeneic tumor models as a framework to guide mechanistic studies and predict therapy response in distinct tumor microenvironments
Source: PLoS One. 2018 Nov 2;13(11):e0206223. doi: 10.1371/journal.pone.0206223 (PMC6214511; doi:10.1371/journal.pone.0206223)
Supplement: S2 Table — Comprehensive list covering all transcripts, including immunology defined genes listed in S1 Table. Transcripts with FPKM values <10 across all four models were removed from this analysis. Transcripts that do not adhere to the criteria of being three-fold higher in a given cell line above all other cell lines were also removed. (XLSX) [file pone.0206223.s002.xlsx]

## Sheet: remove RPKM<10 (3X DE)
Gene	RENCA	EMT6	CT26	B16F10
42982	72.9337	1.56913	0.096883	1.90647
0610010O12Rik	94.2941	8.176	9.27642	24.6984
1190007F08Rik	25.5026	0.396251	0	0.627742
1300014I06Rik	25.1946	5.437	4.17823	0.013364
1700007L15Rik	12.5269	1.51031	1.50508	2.20665
1700112E06Rik	11.6341	3.39264	0	0.05483
2610528A11Rik	94.3705	0.430479	0.057198	0
4930404N11Rik	15.0645	0.479628	1.51825	2.04609
4932425I24Rik	15.9182	1.80474	3.03398	0.541959
Abcc2	12.4993	0.016104	0	0.171476
Abcc3	11.943	0.008802	0.017285	0
Acap1	38.6857	0.472035	2.16806	0.011115
Acer3	49.1226	12.691	10.2401	4.18897
Acpp	34.5306	1.48975	0.040301	9.71565
Acss3	10.4508	0	0.010151	0
Adamts5	42.7667	11.2202	0	0.730398
Adamts9	15.2945	0.236328	0	0.302549
Adamtsl5	41.1383	7.33165	9.73028	9.10631
Adh1	47.9164	0.16264	0.27553	1.62882
Adssl1	21.5147	6.1539	7.11908	1.771
Agt	20.6404	0.224158	1.78705	4.07427
Aif1l	300.966	4.28339	0.051252	4.04273
AK008705	16.3576	0.069206	0	0
AK009785	11.871	0	0	0
AK077350	10.1543	0	0	0
AK085279	11.8333	0	0	0
AK144695	93.937	10.3754	22.1327	0.107478
Akap12	63.0098	0.96923	0.09841	10.3656
Akr1c13	48.7763	0.929102	1.12474	13.3984
Amt	15.7612	0.212868	0.081589	0.320438
Ank3	17.7762	2.83217	0.021237	0.217518
Ankrd23	55.3981	0.540748	0.529636	1.83704
Aqp9	29.5265	0.016412	0.057242	0
Arhgap24	94.031	0.251732	0.061735	0
Arl15	22.5096	5.59968	6.73331	5.02046
Arl4d	28.7663	3.31251	1.95559	0.524083
Arvcf	15.0484	2.58338	0.665145	3.09165
Asb5	14.2527	0.054962	0.013693	0
Atf3	45.8039	5.95106	0.065651	8.15683
Atp1b1	135.346	0.188117	0.035708	0.082495
Atxn7l1	55.4468	11.6282	11.8225	9.16597
B4galt5	90.2895	12.5047	15.4289	22.397
BC065997	16.4469	0.326317	3.31533	0.48558
Bcmo1	40.5207	0	0.009291	0
Bicc1	76.7542	0.3051	0.007077	0
Blnk	23.6533	1.38859	3.6499	0
Btd	30.4703	6.33455	4.35315	9.24677
C130074G19Rik	22.3636	0	0.007578	0
C630004H02Rik	17.0303	5.17762	3.44233	1.42086
Car2	70.9612	0.775728	0	0.069763
Card9	26.2294	0	0.013421	0.015503
Carhsp1	180.753	45.3306	47.2688	14.745
Ccdc68	18.6502	0.455263	0	0
Ccdc80	53.7305	0.313152	2.84165	2.17007
Cd24a	291.625	1.02746	0.023812	0
Cd274	17.2105	1.44919	1.14108	1.23572
Cd37	19.0613	0.070787	0.301492	0.164299
Cd40	11.1274	0	0	0
Cd59a	29.7107	0.84337	0	5.84443
Cd68	43.0913	7.51956	1.14607	0.789229
Cd97	21.0488	2.87791	0.058289	6.35453
Cdc42ep2	17.4261	5.68959	2.56668	0.23451
Cdh1	39.0934	0.009833	0.039195	0.232039
Cdh16	231.794	0	0	0
Cdh3	49.9562	6.84326	0.037899	0.006254
Cdkn2a	198.612	6.07492	0	0
Cdkn2b	15.3424	0	0	0
Cebpa	15.2495	0.600158	0.016386	0
Cela1	17.599	0.039234	0.488721	5.12603
Chdh	27.3522	0	0.007934	0
Chpt1	105.416	12.4374	14.3102	16.5006
Chrdl2	35.2798	0	0	0
Chst12	38.8962	7.90827	5.06023	9.88663
Chst13	24.387	0	0	0.030255
Cldn1	32.4348	0.020083	0	0
Cldn3	84.0202	0	0	0
Cldn4	48.9415	0	0.011939	0
Clic5	28.5703	0	2.55253	0
Cnksr3	13.8358	3.42935	4.50228	3.34597
Col18a1	222.742	14.3759	12.338	0.029709
Col4a4	10.6458	0.002782	0.008317	1.30016
Comt	259.039	57.4567	34.8076	30.6645
Cpn1	12.3367	0.024228	0.012072	0
Crb3	10.3685	0	0	0
Creg1	482.703	16.8873	29.0446	19.32
Crip1	370.171	43.4408	0.096738	6.0343
Cryab	758.842	61.7349	13.1871	170.756
Csdc2	17.888	0.095846	0	1.97596
Cth	48.4974	15.0704	0.156065	9.51307
Ctsk	18.7579	0.102478	0.043767	0.926883
Ctxn3	86.2646	0.058957	0.014688	0
Cxadr	61.7726	0.053995	0.037428	0.573523
Cxxc5	21.8535	0.247109	0.482639	3.44222
Cyp27a1	11.1012	2.35328	0	0
Cyp4b1	21.2062	0.014483	0	0.053395
Cys1	57.3947	0	0	0.070653
Cytip	18.1097	0.022699	1.74758	0
D14Ertd449e	19.9818	4.94477	2.6566	5.24232
D730039F16Rik	13.1139	0.153465	0.009556	0
Depdc7	19.547	5.32003	4.61064	2.74278
Dhdh	14.3271	0.007924	0	0.237165
Dmpk	72.6364	3.06947	6.66122	1.72317
Dppa2	17.4522	0	0.055696	0.064336
Dppa4	21.0443	0	0.472448	0
Edn1	12.3181	2.55466	2.25065	0
Efemp1	73.5848	0.053281	0.053097	0.012267
Efhd1	32.9562	0.01202	0	0.055347
Emb	95.4578	1.175	0	25.6421
Enpep	37.3009	0	0	2.6254
Enpp5	105.315	0	0	17.514
ENSMUSG00000064356	27.414	1.89236	1.28397	1.24605
Entpd5	67.2341	4.64365	2.475	7.09712
Epb4.1l5	39.5142	1.56322	2.86426	3.83289
Epn3	24.8618	0.402194	0.125038	0
Esam	24.2367	0.140409	0.011646	0.013452
Ethe1	102.782	10.7385	23.3681	7.31599
Eya2	71.9683	2.15682	0.023001	0
F11r	93.0088	21.3727	0.034895	2.26507
Fam102a	13.0609	3.45496	2.59714	3.96895
Fam167a	13.7603	3.53491	0.005105	0
Fam176a	29.6349	0.282246	0	3.63046
Fam84b	81.3287	0.0078	4.41461	6.84511
Fbxl2	13.0012	1.91592	4.06875	2.28154
Fcho1	17.2042	0	0.33024	0.063229
Fgf21	70.6542	3.39074	0.981735	0.026373
Fhod3	16.5711	0.508662	0.013519	0.206716
Fndc1	15.2715	0.014845	0	0
Folr1	130.969	0	0.180175	0
Fxyd2	337.069	0	0	0
Fzd4	20.6383	0.836052	1.03265	2.27048
G730013B05Rik	31.5564	0.737286	5.99297	0.018864
Gas6	100.187	1.22998	0.016676	0.009632
Gcnt1	15.6846	0.993896	3.19668	1.7731
Gdf15	166.544	44.924	0.139619	0.09216
Gem	18.4969	3.18184	0.115946	0.475825
Gipc2	19.6747	0.250984	0.03421	0.079036
Gm10451	26.6035	5.26323	0	3.2627
Gm6484	26.6272	0.200658	0.049991	0
Gm773	61.5357	0.068442	3.54608	0
Golm1	146.104	15.0964	18.8552	16.3304
Gpd1	66.4897	0.126324	0.267509	9.58826
Gpr123	25.8217	0	0	0.005249
Gprc5c	41.5194	8.39679	0	0
Gpt	38.3963	2.23587	1.44027	1.68618
Gpx3	546.971	0.085812	0.028505	0.131709
Gramd3	13.5023	4.37569	0.520291	3.21492
Grb7	20.3056	0	0.00902	0.031258
Grn	682.943	117.232	82.1932	77.3238
Gsta3	42.4923	0.016012	0	0.073728
Gstt1	127.01	22.2819	0	1.01154
Gstt2	43.2785	1.20966	0	0.553283
H6pd	67.3458	12.8043	8.42264	9.23468
Hacl1	17.879	1.40884	0.594619	2.96689
Hagh	81.0788	24.1922	22.7647	11.5403
Hcn2	11.5135	1.5279	0.629344	3.02517
Heg1	37.5706	7.71649	0.397445	2.95501
Hist1h2bc	20.4503	4.3987	2.08482	6.3202
Hoga1	35.9646	2.37529	0.595074	1.20676
Hoxa11	18.8652	0	0	4.36957
Hoxa11as	10.9702	0	0	2.47504
Hoxb7	21.7524	0	0	0.393622
Hoxb9	33.9973	0	2.43041	6.84761
Hoxc10	33.1585	0	0	0
Hoxd10	16.1832	0	0	0
Hoxd8	14.1844	0	3.47997	0.017561
Hoxd9	20.6985	0	0.010296	0
Hrsp12	119.945	38.7867	11.9416	15.1259
Hsd11b1	15.6401	0	0.064205	1.27332
Hsd11b2	19.0443	0.048027	0	0.013818
Hspa2	16.0586	1.15504	0.314621	4.27119
Hspb1	132.935	28.9282	0.023944	0.331898
Idh1	206.718	34.9289	29.78	56.2689
Ifi30	141.827	34.413	40.0462	38.7741
Ifngr1	75.5644	13.551	9.10575	7.21059
Igsf5	48.6613	0	0	0.015708
Il17rb	24.3912	0.010522	0	0
Il6ra	62.8547	4.59078	8.59361	0.156889
Inmt	98.8048	0.042417	0.359293	0
Irf8	8.55682	0.030698	1.26675	0.044173
Irx3	13.531	3.713	0.4234	2.2434
Itga1	10.8334	1.77262	0.01216	3.5146
Itga7	37.1269	1.11125	0.671905	0.198615
Jund	84.3398	14.9642	7.83555	7.06389
Kank3	25.1717	5.20718	0.141829	0.369794
Kcnk5	28.5311	0.490162	1.7739	0.586518
Kifc3	65.2049	10.5943	7.3619	20.4902
Klhl22	111.873	27.2287	22.0617	36.4062
Klrg2	15.2008	1.92052	0.862187	0.678557
Kng2	23.067	0.875924	0	0.015482
Krt18	124.512	27.0582	22.8719	0
L1cam	26.3135	0.004103	0.004089	4.78508
Lbp	32.8196	0.266368	0.017126	0
Leprel1	31.2414	8.59931	0.038472	7.57702
Lims2	13.8415	2.59634	2.04938	0.251528
Llgl2	21.1807	1.94175	1.82515	3.61331
Lmcd1	13.5212	0.012556	0	0
Lrrc31	12.4511	0	0	0
Mal	56.8763	6.71658	0.007783	0.197788
Mapt	16.5905	0.008478	0.0464	3.26403
Mettl7a1	97.6511	17.6217	2.00939	7.70956
Mfap3l	15.7007	0.767074	3.42446	0.661395
Mfsd12	30.5545	2.15432	2.73121	6.3392
Mgst1	172.34	41.6897	0.022928	12.7657
Mia2	21.2636	5.43736	0.053123	0
Mme	62.0185	0	0.015278	0.745883
Mocos	15.3581	4.64733	1.2693	0.277393
Mospd2	49.1619	10.6543	10.1181	3.69404
Mustn1	36.3207	0.920107	3.79605	0.021183
Mxra8	59.4876	19.4791	6.02954	6.066
Myo5c	16.3167	0.152801	0.027128	0.033494
Nagpa	23.4644	4.70224	3.78669	7.51947
Napepld	11.7566	1.06737	1.31519	1.44761
Napsa	50.0483	0.014669	4.32712	0.016887
Ndrg1	357.253	89.522	111.736	17.5621
Neu1	77.0769	2.36685	2.09471	14.9333
Ngf	14.7938	0.098865	3.35788	0
Npr1	10.9717	0.453671	0.026594	0.043008
Ntn1	23.1071	6.12543	0	0.008705
Ntn4	15.8732	2.83462	2.31365	0.424715
Nuak2	13.5894	3.33679	1.3774	0.024075
Nudt13	12.4925	2.29384	3.11374	3.24934
ORF63	20.5763	0	0	0.030236
Orm3	10.2012	0	0	0
Ostn	42.2296	0	0.511538	0
P2rx4	87.1284	7.48182	18.4616	22.5806
Padi1	24.1448	0.450715	0.359738	0.028462
Pald1	18.2032	4.64874	5.55595	6.03083
Palm3	14.8962	0.425241	2.96742	0.030594
Pard6b	21.5932	1.93408	3.43493	2.43948
Parm1	36.3634	0.44745	0.02074	0.011979
Pax8	46.4232	0.077272	0.008556	0
Pcbd1	109.207	19.6069	0.026693	0
Pcsk9	108.186	2.81086	0.006156	1.62851
Pde8a	36.4791	2.60386	0.024176	3.16496
Pdgfb	23.2372	0	0.029396	0.050935
Pdpn	131.029	39.627	9.54551	16.589
Pdzk1ip1	24.4084	0.105066	0	0.194902
Pea15a	259.862	32.0493	47.1699	27.7985
Pfkfb3	42.9001	5.46115	0.112917	9.39142
Phospho1	30.4295	1.92285	3.13092	2.6109
Pklr	18.1628	0	0	0.009386
Pla1a	66.0193	13.299	0.372398	0.012652
Pla2g5	15.6453	0	1.50019	2.03736
Plat	81.7432	21.7816	1.8786	6.15548
Plin2	431.337	116.506	94.6535	59.2154
Plin4	17.9709	0.267667	0.270497	0.016424
Pltp	92.8295	24.7316	0.072008	5.6689
Pmaip1	14.2211	0.138973	0.008147	0
Pou3f3	15.9141	0	0	0
Prdm8	10.9109	0	0	0
Psap	2518.82	414.994	223.034	306.39
Ptger3	29.028	0	0	0
Ptgr1	66.2113	13.7973	2.57931	0.047482
Ptpn3	11.2254	2.39097	3.52186	2.70098
Ptpn7	22.4807	0.218532	1.07972	0.114709
Pxmp4	10.4997	2.3647	0.677497	2.62002
Rab20	16.9322	2.2483	0.419244	4.54993
Ramp2	69.8509	0.099524	0	5.65875
Rasgrp2	18.4051	0	0.118713	2.05693
Rasl11b	14.6738	0.122716	0.012229	0.946462
Rasl12	19.3645	5.22096	0.008901	0.020564
Rbm47	11.4742	0.666523	0	0
Rbpms	47.2206	0	11.9384	9.17609
Rcan1	90.5303	7.2974	7.80447	11.0623
Reep2	11.1888	0.07232	0.07207	0.066601
Rgl3	18.6075	2.38636	0	5.51033
Rhox2d	56.5275	0	0	0.031415
Rhox2g	33.6926	0	0.027026	0.031219
Rhox2h	23.7705	0	0.083264	0
Rnf43	14.8917	0.024583	0.018893	0
Rogdi	20.2406	5.09672	3.89861	5.45437
Rrad	42.8791	4.07749	0.109821	0.079287
Rusc1	16.6834	2.38717	3.04128	2.91789
S100g	45.6754	0	0	0
Sall1	12.371	0	0	0
Scn1b	18.1043	2.03356	0.085628	1.6815
Scx	49.0626	7.14292	0.019033	0.021985
Selenbp1	32.8358	2.24615	0.128315	9.70028
Sema4a	29.7055	0.441611	0.368845	0.49923
Sepp1	931.468	0.566451	0.266269	22.3743
Sepx1	156.06	22.8373	23.8992	15.9852
Serpina12	12.4361	0.017639	0	0
Serpinb8	12.1851	0.017625	0.843061	0.669524
Serpinb9b	129.387	24.5642	6.96042	0.841573
Serpinb9c	30.94	1.0474	1.04306	0
Serpinb9d	75.3085	0.331785	0.102908	0
Serpinf1	64.0492	5.96861	8.91468	7.51043
Sh2d4a	19.9098	0.360687	0	0.045131
Sh3rf2	18.0983	0.902494	0.018442	0
Slc16a10	28.1227	0.567062	0	0.013891
Slc16a12	36.5018	0	0.005587	0.006454
Slc17a1	25.0847	0	0	0
Slc31a2	29.6551	1.33161	3.33568	2.51748
Slc35f5	42.4939	8.18722	10.2402	12.0116
Slc43a2	15.7096	1.4072	0.015666	2.50862
Slc43a3	40.8427	0.008341	0.033187	0.028807
Slc7a7	19.9571	2.55476	0.359877	2.81309
Slco2a1	79.0532	15.7864	0.220843	0.049391
Slco4a1	23.9171	0	4.63462	0
Slfn2	28.0472	0.560657	0.84457	0.030018
Slfn8	17.5195	1.80368	3.35715	0.01868
Slx4	18.7079	5.26461	5.67154	3.99888
Smagp	49.1368	0.022742	0.067991	0.157077
Sorbs2	53.176	0.603012	0.005013	0.371612
Sox12	14.8136	2.05465	0	0
St6galnac2	76.826	1.78222	0	0
Stra6	63.9009	0	0.109392	0.072207
Sult1c2	100.745	0	0	0
Syce2	15.3892	0.143394	0.081296	0.04061
Tfcp2l1	23.191	0.067874	0.051312	0.005388
Tgfb3	32.8037	9.33863	4.86712	8.50709
Tgm2	190.805	32.7635	17.4932	0.439861
Tmem37	34.6916	9.96273	7.78101	0
Tmem98	41.6517	1.23043	0.015521	0
Tnc	10.1951	0.033614	0.006767	0
Tnfaip6	15.8628	0.352342	0.094533	2.43357
Tnfrsf13c	14.9744	0.01159	0.034633	0
Tprn	50.6618	7.80381	5.05106	4.43827
Trpv4	44.5171	9.91371	0.007027	0.085161
Tspan8	69.4262	0	0.874502	0
Tspyl4	12.8584	2.99852	0.016632	3.93841
Tst	24.0809	6.63157	0.670725	2.75731
Ugt1a7c	161.917	11.3204	2.07999	0.053074
Wfdc2	820.634	213.315	0.183229	0
Wnk4	26.6109	0.676355	0.156372	4.92722
Ypel2	11.7684	0.6816	0.229354	1.32977
Zfp503	38.0001	5.94803	0	0.373473
Zfpm1	13.8872	2.29392	1.72406	2.69963
1190003J15Rik	7.00388	22.4033	0	0.037
2010111I01Rik	6.48277	58.4557	8.32906	1.57324
2310002L13Rik	0	42.1014	5.33917	0
4933426M11Rik	14.26	48.3447	14.3909	15.6732
A230050P20Rik	0.011756	16.8455	1.76174	0.015078
A430078G23Rik	0.006584	18.5124	0.066144	0.008419
Acta2	0.0439	460.811	0.048587	0
Adamtsl4	1.22289	11.2215	1.04105	3.02545
Adm2	14.7312	50.4098	3.55867	0
AF032968	0	24.6906	0.164766	0
AK006637	0	11.4216	0	0
AK051417	0	25.8109	0.574696	0.065787
AK145129	0.570183	33.7884	4.83442	6.44782
AK189470	3.75123	12.6606	1.86016	1.83733
AK189692	0	20.0725	5.8e-05	0
AK205379_4	65.5774	615.538	125.824	0
AK210533_2	39.7222	633.17	125.824	0
AK212965	0	16.6673	0	0
AK217757	3.98967	39.1142	3.04521	3.69353
Aldh3a1	0.056559	174.665	17.0084	0.015658
Angpt1	0	25.0736	0.01592	0.024528
Apol10b	0.127877	33.44	1.49148	0
Aqp5	11.3651	52.3179	0.446081	0
Areg	0	154.171	5.42779	0
Arhgap8	0.146077	40.4365	0	0.033955
Arhgdig	0.03786	12.2146	0	0.193607
Arhgef3	2.38617	11.2865	1.95488	0.04608
Artn	0.010871	16.8231	0.012028	0.309833
Ass1	0.011978	94.8324	0	31.0392
Basp1	0	11.6609	0.023311	3.8641
Bgn	0	32.212	1.54759	0
Bmp4	0.010452	24.6339	0.011568	0
Car9	0.219392	13.5338	2.44944	2.43506
Cbr2	3.27188	52.7422	0.063529	0.366924
Ccnb1ip1	1.16592	12.4882	2.62377	0
Cdc42ep3	2.18497	17.7253	0	1.75221
Cdcp1	0	42.1174	0.011235	0
Cdyl	3.1262	11.8386	0.013568	3.91828
Cib2	0	21.5487	0.029376	0.882279
Clcf1	6.26431	20.5712	2.57815	0.280783
Clec2d	0.756321	15.2802	3.1167	0.205727
Clrz	0.059469	20.0119	0.032909	0
Col1a1	0.249497	263.831	38.0784	0.34555
Col3a1	0	33.1174	4.46875	0
Col6a1	7.44378	55.1625	3.54006	0
Col6a2	0.400384	31.3846	0.075375	0
Colec12	0	41.7464	0	0
Crabp2	0.086825	231.353	0.480467	0.804759
Crlf1	0.078614	13.3475	0	1.90535
Csf1	64.5688	356.261	78.3475	4.50029
Ctgf	5.38409	46.9872	12.5747	4.82453
Cthrc1	0	23.6656	0	0
Cx3cl1	0.528326	14.731	0.034395	0.286068
Cxcl1	4.30236	74.8505	1.11636	0.052635
Cxcl2	1.92013	17.6483	0.019964	0
Cxcl3	3.16273	21.5034	0	0
Cxcl5	0.247884	67.4087	0.117576	0
Cyp1b1	0	160.669	0	0.019482
Cyr61	25.2768	358.756	24.8514	14.9137
Cyth4	0.084024	12.9287	0.73875	0.053691
D4Bwg0951e	0	17.3544	0	0.294
Dak	3.93504	23.0837	4.4904	4.70239
Dnaja4	0.129239	11.5657	0.067753	0.174998
Dsp	0.004073	15.4917	0.01127	0.007811
Ecm1	17.143	254.115	5.9944	2.61996
Ecscr	4.13338	36.2033	1.63714	10.2451
Egr1	2.4038	72.7512	14.6251	0.252029
Ephx2	0	14.4374	0.244357	0
Fas	0.013146	11.0675	0.130948	0.016807
Fhl3	11.8257	54.3884	18.0667	2.14921
Flrt2	0	16.0191	3.57354	0
Flywch2	0.028395	24.4712	0	1.74246
Fosl2	15.7439	72.8402	14.0026	2.11287
Foxc1	0	19.1241	2.25422	2.03433
Fst	0	20.0191	4.12795	0
Fyb	0.696676	10.5105	0.314987	0.317206
Fzd1	0.004462	13.9404	0	3.12048
Gatsl3	2.49874	14.352	4.51136	3.69466
Gbp1	1.07978	38.9612	1.61882	0
Gbp2	1.4403	85.9096	2.36026	2.13638
Gbp4	0.472169	23.359	0.322282	0
Gchfr	6.18058	84.6115	25.1271	0.397063
Gm11127	10.8678	48.3301	7.23031	4.20689
Gm2115	0.304097	15.8849	5.28049	0.844575
Gpc4	0	13.6149	0	0
Gpr116	3.14279	18.8889	0.395425	0
Grb14	0	12.878	0	0.216181
Grk5	7.75176	29.0933	8.52408	6.04864
Gsdmd	22.5826	71.111	17.8836	0.604694
Gsta1	18.7436	190.295	1.00447	45.2171
Gsta4	14.9066	279.921	8.16994	15.4596
Gstm1	81.796	336.022	17.0595	20.7291
Gtf2b	29.8496	154.004	46.7822	40.0761
H2-Q1	1.7267	13.4532	1.78918	0
H2-Q4	42.9903	129.663	20.9318	6.79751
H2-Q5	0.148623	15.3435	0.056038	0
H2-Q6	3.56609	28.6784	0.514773	0
H2-Q7	0.209786	46.7382	0.077137	0
H2-T10	3.70851	17.0526	1.72229	0
H2-T9	7.28827	29.1896	4.32275	2.1255
Hcfc1r1	6.15719	44.6863	13.8805	8.63934
Hmox1	70.8786	343.6	36.602	39.4597
Htra1	10.2793	321.316	4.54257	0.031141
Hyi	0	12.3877	1.51931	3.70653
Id3	12.2994	123.005	30.2649	5.9752
Ier3	13.9617	138.616	12.2982	8.70698
Il13ra1	2.2902	12.3229	0.052806	1.85705
Irf1	12.1395	42.9365	13.3287	5.13259
Isg20	16.701	51.5973	12.7917	0.461224
Kdm5b	1.79631	11.3989	2.3386	3.65035
Lif	1.95499	34.9276	7.14842	0.276186
Ly6a	21.1336	245.494	4.18281	0
Lysmd2	0	12.6794	0	0.333004
Macc1	0	20.6329	0.101986	0
Mmp2	4.29771	20.0124	0	0.780221
Myl9	0.378807	32.9148	0	1.08388
Nfkbia	13.4485	45.0411	7.79123	7.76622
Nfkbie	2.14642	20.8269	2.25944	5.42627
Nfkbiz	3.71765	15.9211	3.42682	0.783928
Nlrc5	1.96657	13.2167	0.869446	0.021577
Nmrk1	3.11246	17.9273	2.38001	1.19863
Nqo1	13.544	270.041	0.821932	2.12419
Nt5e	0.051217	23.1111	0.030197	0
Ogn	4.16862	166.146	12.9162	0.070037
Osmr	1.74092	11.4331	0.032272	0.552711
Padi3	2.06308	35.9104	0.563781	0.056984
Pak1	0	25.326	5.37691	0
Palld	9.20416	43.7631	1.11349	1.90975
Pdlim1	0.064902	164.804	48.9927	17.2991
Pdlim5	53.1029	242.871	43.7373	26.4652
Perp	0	11.8986	0	0.170884
Pgcp	5.05453	46.9124	15.2979	3.4093
Plk2	1.38095	161.932	39.5924	3.19213
Plscr2	9.94822	53.0041	10.7363	0.540362
Podnl1	1.12379	42.8757	4.07085	0
Pon3	19.1534	69.8138	11.2766	7.46039
Praf2	13.2181	46.1627	12.2985	13.3574
Prl2c2	0	34.774	0.109473	0.063229
Psmb10	12.4751	64.1659	16.8371	8.18088
Psmb9	29.0853	107.081	3.05806	0.309867
Ptgs2	0	332.54	64.863	0
Ptk7	0	35.2696	5.09148	0.745443
Ptx3	0	276.665	0	0
Rangrf	6.86453	31.1233	0	4.27788
Rasa4	2.90633	10.136	1.70572	0.098963
Rbp1	0	45.8039	0.296291	0.047536
Rcn3	0.028251	11.0722	0	2.70053
Relb	3.67737	25.3535	6.62951	4.36716
Rgs2	0	18.0837	0	0.639115
Rhbdl2	3.27262	14.0693	0.385278	0
Rhox4a	0	23.6599	0.024425	0
Rinl	0.024559	30.878	0.163079	0.125584
Ripk2	4.21989	21.1327	6.10899	4.6377
Rnd3	8.06384	46.3128	8.73282	3.42781
Rspo2	0	30.4629	0.006997	0.039994
Scmh1	0.680157	37.6813	9.86355	7.32833
Scn3a	3.16244	31.1072	0.002262	0.028707
Sdc3	0.400771	42.1596	0.004349	9.67828
Sema3c	0.004792	84.388	0	0.448597
Serinc2	0.374883	51.8159	0.011514	0
Sfn	0.157448	18.1586	0.214468	0.74322
Sgk1	2.34121	120.659	8.226	2.07626
Slc24a3	0.022812	24.6796	0	0.029164
Slurp1	0.223264	11.6539	0.617743	0
Snhg12	44.8034	135.47	21.5689	10.291
Sod3	0.840653	21.049	0.095154	0.732771
Spry1	2.53277	32.8802	0	4.83467
Stbd1	3.93497	56.6133	8.41966	0.06291
Sybu	0	16.4534	1.92843	0.018814
Syk	0	7.27259	1.88053	0.92293
Syt13	1.71347	23.4545	0	0
Tgfbr2	0.012427	54.6374	13.3353	12.0456
Thbd	0	14.9562	0	0
Thbs1	24.3812	255.566	17.6068	1.89003
Tiparp	9.47947	49.1896	15.3541	9.74588
Tmeff1	0.010391	11.1332	0.026547	3.25647
Tmem79	3.13526	23.5636	0.758631	2.3297
Tnfrsf10b	9.51125	32.0235	10.2325	4.86307
Tpm2	0.388752	118.976	11.2714	0.078292
Traf1	1.72633	21.9432	1.92603	0.014674
Trp63	0.035915	17.1678	0.155463	0
Ttc39c	0	18.592	4.01382	1.09454
Upk3bl	0.6021	6.5232	0.458418	0
Vcan	0	46.8299	0.079801	0.060137
Wdr66	2.06408	16.7315	0.564972	0.109494
Wisp1	2.13561	26.9487	0.189431	7.205
Wnt10a	2.82923	25.6348	2.93278	0.203776
Wnt10b	0.198154	19.1144	1.72681	0
Zfp36	3.083	17.6894	2.83182	1.83622
1700012B09Rik	0	0.296756	23.3886	0
1810011O10Rik	2.50983	3.12972	16.033	0
2610305D13Rik	0	0.14402	18.9121	1.32167
4831426I19Rik	2.63882	7.80874	27.4846	1.61773
5430435G22Rik	3.82614	3.05921	12.9281	0.010419
A330021E22Rik	4.66758	4.12843	16.4952	0.100055
Abcb1a	0.086664	1.21188	26.1044	0.010309
Abcb1b	0	0	87.2769	5.68747
Acsbg1	0.056319	4.62851	21.3483	0.234003
Aim2	0.100104	0.008552	15.127	0.019689
AK134344	1.91399	9.73329	95.666	0.018398
AK205379	3.48641	0.063222	12.812	0.159924
Ak5	0.081844	0.356591	11.7337	0.627803
Amigo2	0	0.42135	31.5873	0
Ank	21.9009	15.8873	72.1496	5.36511
Anxa8	0.10458	6.4345	48.8672	0
Apln	0	0.530687	25.8724	0.357016
Arid5a	2.18208	4.40675	18.5087	3.43762
Aspa	5.50416	2.04279	17.6617	0
Atp10a	0	0.02777	17.0509	0.004567
Baiap2l1	11.897	0.280553	257.349	6.14386
BC094334	0.247714	2.56352	10.256	2.89339
BC134356	0	0	46.6	2.97434
Bcl6b	0.034213	0.025331	13.4421	0
Bmper	0.046354	0.377523	10.42	0
Cd300lb	0.411009	0.060267	14.8761	0.008672
Cd34	0.059628	0.05281	462.55	0.020264
Cd80	0.011492	0.884463	10.9821	0.062663
Cdh26	0	0.210132	26.1015	0
Ces1g	0.384055	0.549749	10.9947	0
Chrnb1	4.96345	2.83695	17.1841	0.325411
Clca1	0	0.037138	32.308	0.034199
Cldn6	0.025944	0.028813	129.97	0
Col4a1	0.10927	0.009835	38.3032	7.09044
Col4a2	1.05187	0.003376	29.2923	5.87265
Cplx2	0.027749	2.62837	15.6075	0.010136
Ctsl	546.462	609.649	1908.58	67.4244
D14Ertd668e	1.92147	1.07736	10.6765	0.048939
Dock8	6.71411	2.06977	26.2232	0.697133
Dpysl3	0	0	81.4007	4.18021
Dusp9	1.93909	6.29188	38.6696	0.610507
Efnb2	0.045232	2.96884	29.1951	0.121436
Emp1	21.7828	232.233	699.612	8.05891
Ephb2	0.012029	3.35124	13.0338	0.303174
Ereg	0	0.005246	18.6323	0
Esm1	0	0.010317	117.132	0
Etv4	3.97865	4.21261	44.5545	0.669663
Etv5	5.79628	7.43072	30.1461	4.59383
Fam63a	10.3578	21.054	76.9829	16.7931
Fgf7	0.01986	0.334369	50.0776	0.168619
Foxg1	0	0	11.6557	0
Fxyd5	4.15835	10.5575	154.314	6.82665
Ghr	0.193263	9.81407	30.1639	1.27424
Gm129	0.358176	0.343947	30.7613	0.322262
Gm13154	0.096745	0.069134	11.7378	0.061842
Grem1	0	0	54.0195	0
Hmga2	0.032746	15.1254	88.8149	20.7893
Ifi27l2a	2.283	0.328019	16.0251	0
Ifitm1	0.055657	0.128379	32.3699	0
Il1rl2	0	2.02812	17.922	0
Itga6	0.413477	2.80207	63.9484	21.0248
Itgbl1	0	1.44518	38.4573	0
Kcnn4	1.23098	8.82487	39.3171	0.281484
Khk	3.11311	0.058271	18.0401	0.31303
Klf4	13.8944	20.8408	69.1105	1.34558
Krt20	1.54868	0	27.7936	0
Lamc2	5.55509	0.840284	20.6467	0.014509
Lef1	0	0.017043	5.12367	0.156954
Med10	36.8956	51.8744	166.547	37.0573
Mgat3	0.012563	2.69283	19.5215	3.64056
Mid2	1.98376	1.44446	10.6069	2.90986
Myh14	2.00222	0.58837	17.8641	0.94092
Nefm	0	0	66.1065	0
Npcd	0	7.60012	25.9383	3.91501
Ogdhl	0	0	12.1161	0.614614
Olfm1	0.021804	0.021545	10.5942	2.41705
Olfml2b	0.037872	3.3438	12.0784	0.468034
Pkn3	2.54876	3.50017	14.9221	3.06778
Pmepa1	0.004312	2.91612	12.8457	1.84104
Ppef1	0	0.008738	10.1212	0
Ptprn	0.019271	0.006138	33.1091	0
Qrfp	0.129646	2.0082	12.6267	0.043617
Rabggtb	56.5108	41.7171	279.308	53.9461
Rarres1	0	0	13.04	0
Rgl1	3.03061	1.85871	83.7306	13.6474
Rhox5	1.73379	0.298322	273.857	0.405848
Rnf113a2	0.028333	1.21146	18.109	3.85768
Rpl39l	0	0	232.137	0
Sdpr	0.006395	25.7939	149.45	28.5151
Sele	0	0	26.3357	0
Selp	0.005682	0.006311	18.2185	0
Sema5a	0.022716	1.15211	21.0799	0
Sgcd	0	2.29523	11.6864	0.374897
Slc1a2	0.101031	0.091803	19.5678	0.002271
Slc1a5	82.4703	105.043	338.99	58.3089
Slit2	0	6.24882	41.4116	1.70579
Sox2	0	0	11.7348	0
Spry4	0	1.5504	22.1439	0.821627
Suox	9.04011	18.3895	91.4912	1.26524
Tm4sf1	0.05466	64.2142	263.553	52.62
Tmem119	0.141018	0.041763	30.4546	0.925456
Tmem74	0	0.014739	10.8252	1.76456
Tmsb4x	0	6.60599	332.931	27.771
Tnfrsf22	0.631864	5.35712	16.503	3.37828
Tnfrsf23	3.12914	3.59519	17.6848	0.046686
Tnnt2	0.207042	2.30217	45.0922	0.242634
Trim54	0.038255	0.028324	17.0061	0
Uaca	6.19235	9.53555	48.3852	15.4718
Ube2l6	0.126763	8.04024	32.6887	4.39363
Ugdh	61.2868	58.5049	237.211	22.2446
Upp1	1.61675	2.7098	13.2128	0.556774
Wipf1	0	6.75506	21.6161	6.79905
42987	30.8211	26.2212	34.0371	130.686
2210408F21Rik	2.39226	3.90849	2.31823	23.9934
2410076I21Rik	0	0.163804	0.048972	17.5343
4932411E22Rik	0	0	0	29.2019
5031439G07Rik	24.7417	24.033	24.3494	103.718
5730469M10Rik	0.025393	0.028231	0.588753	23.0952
5830417I10Rik	2.40223	1.46946	3.24646	23.8512
6230427J02Rik	0.405074	1.51321	0.142646	11.958
6330416G13Rik	5.26767	2.97806	4.5105	31.8043
6720456H20Rik	1.80662	1.89704	3.17271	11.2696
A830019P07Rik	3.81478	0	0	13.3098
Adam12	0	0.388213	1.71561	11.8608
Adamts4	0.707388	3.56825	0.359075	11.4545
AI506816	8.11424	29.1301	24.8584	224.202
AI662270	0.013875	0	0.046067	58.0037
AK003208	8.43618	6.50084	6.73434	29.4412
AK015544	2.04021	5.48034	4.23714	55.8742
AK079912	0	0	0	5.52395
AK213543	3.74246	0	1.07691	13.8326
Akap2	36.3045	8.05198	20.2883	119.62
Alx1	0	0	0	12.1621
Ankfn1	0	0	0.019382	38.3641
Aph1c	0.855466	0.147463	0	32.3012
Apoe	0.580036	0.520303	1.20687	755.517
Apold1	0.130872	0.013213	0.019751	28.0782
Arhgap30	0.113195	0	0.072276	65.567
Arhgap31	0.37948	4.49825	4.30348	15.2938
Armcx2	0	0	0	23.6033
Atp13a2	10.5698	2.46592	3.59747	63.1916
Atp6v0c_2	82.0199	40.902	52.5452	605.572
Atp6v0e2	21.5169	0.366729	6.38963	85.4389
Atp6v1e1	69.6727	41.8606	74.5242	290.659
Atp7a	2.62188	3.11174	3.42197	21.0951
Atrx	10.8253	16.3888	20.5549	71.3025
Bace2	0	0	0	37.2089
Bcas3	4.87931	3.76067	2.09444	18.4037
Bdh1	4.64151	0.014129	0	26.1116
Bdh2	0.202175	1.35314	1.0666	12.3998
Bend6	0.194698	5.87562	5.70339	21.684
Bfsp2	0	0.028104	0	42.4103
Bhlhb9	0	0	0	11.4732
Bnc2	0.088124	0.010143	0.158383	11.3148
Brwd3	2.14146	2.57222	2.11707	12.7244
C2cd2l	6.51564	2.53154	4.55631	22.4228
C530028O21Rik	16.2554	11.8675	0.031536	101.096
Cadm4	0.036261	0.463119	1.29425	32.8793
Cand2	0.078816	2.68566	2.18074	14.0747
Car14	0	0.039519	0	157.114
Car6	2.6386	7.5245	12.5806	117.287
Cbr1	0.578298	0.100352	0.020001	11.4826
Ccdc13	0	0	0.00819	15.8822
Cdh19	0	0	0	26.0466
Cdk15	2.06372	0.161583	0.014656	33.456
Cdk2	35.6921	21.1522	22.8532	209.242
Cdk5rap2	3.27867	8.25802	12.294	37.2032
Celf2	0.002653	3.87072	11.4964	47.9452
Chsy3	0	0	0	55.8129
Cited1	0	0.131651	0	28.6354
Ckb	0.05287	11.1563	0	127.58
Cmas	10.7335	16.1242	11.9038	49.9364
Cntfr	0	0	0	46.1465
Cotl1	21.5738	23.5229	0.013192	123.84
Cpeb4	8.77694	3.1537	3.33921	32.5526
Crmp1	0.013426	0	0	27.593
Ctnnb1	113.68	100.899	120.843	457.858
Ctsc	0	3.49342	0.017493	16.5348
Cul7	4.16668	13.2524	12.0869	43.313
Cxx1a	0	0	0	18.0195
Cxx1b	0	0	0	13.7828
Cyfip2	0.009203	0	0.010185	15.8427
Cyp2j6	2.5812	0.205193	1.72006	33.2633
D84001	0	0	0	34.293
Dct	0	0	0	3825.38
Dcun1d4	3.21412	1.23017	2.52689	15.2763
Ddah2	0.549892	5.60885	1.025	17.699
Deb1	25.7704	15.5692	20.6173	133.185
Dennd2a	0.020381	0.36201	0.045114	15.7564
Dip2c	1.0979	4.32431	4.76967	17.1379
Dkk3	0.148267	0.032933	0.093599	30.2963
Dlc1	0.010251	2.65764	0	12.4586
Dmxl2	5.86007	0	1.84064	52.5153
Dnahc7b	0.001586	0	0	16.1734
Dnaic1	0	0	0	17.5058
Dnmt3a	2.93331	2.03502	2.98238	17.7758
Dok5	0	0	0	8.92578
Dstyk	3.34128	3.49613	5.04581	41.0632
Eefsec	9.49435	9.26479	11.1131	46.1452
Egfl7	4.37403	3.74186	0	15.1556
Ehd3	0	0	0	16.9802
Eif4e3	0	4.40311	0	18.1277
Eng	23.3833	1.06019	1.01653	73.389
Enho	0.046998	0.017399	0.086692	51.4928
Eogt	10.8306	10.7364	11.1293	67.8476
Epha3	0	0	0	31.5416
Eps8	0.153694	16.4373	72.3526	322.799
Ets1	15.4773	22.4931	23.4241	153.61
Eya1	0	2.17688	2.22816	19.4409
Fabp5	0	0	0	381.784
Fabp7	0	0	0	14.8475
Fam174b	0	0	0	49.6894
Fam198b	0.05601	0.003274	17.9441	77.4057
Fam53b	9.76714	3.55856	4.56977	87.9557
Fbln5	0	0.057397	10.4454	56.4506
Fbxo42	8.15056	8.15481	6.04658	27.1588
Fez1	0	0	0	38.2899
Filip1	0	0	0	13.5691
Fkbp6	0	0	0	87.1863
Fkbp9	89.5161	80.1121	88.8536	313.497
Fndc3c1	0	0	0	20.1794
Foxo4	7.49115	4.26609	5.7917	22.8051
Foxr2	0	0	0	22.6942
Frzb	0	0	0	10.7086
Fstl1	0.514238	0.426829	1.28803	17.536
Fzd7	6.2397	10.8413	6.72593	34.4118
Ganc	4.08884	1.34022	1.21768	13.4589
Gas7	0.014394	0.546249	0.428661	10.9296
Ggh	0.014733	0	0.048916	15.3882
Gjb2	0	0	0	51.2076
Gjc3	0	0	0	18.6586
Glrb	0	0.007956	0	84.808
Gm14327	5.14126	2.01253	1.85938	16.8165
Gng11	0	2.92911	0	12.5921
Gng7	1.23187	0.864747	0.314981	13.8768
Gpm6a	0	0	0	18.8451
Gpnmb	206.693	6.10668	31.2873	1755.51
Gpr143	0.023665	0	0	20.5278
Gpr19	2.08212	1.38918	1.51274	10.1193
Gsdmc	0	0	0.015209	51.2947
Gstp2	0.461367	0.380925	0.703321	59.5682
Gulp1	0	6.15507	0	39.7425
Gyg	31.1582	21.1222	21.4685	110.355
Hap1	0.097893	2.41397	0.614056	18.1112
Hgsnat	11.4559	15.1444	14.2122	88.3038
Hmgn3	0.013281	11.011	25.939	80.1215
Hps3	4.8122	4.52982	3.92436	15.84
Hvcn1	0.90808	0.847922	0.679273	45.3156
Ica1	0	0	12.1599	48.2015
Id2	8.35486	29.5934	11.4734	123.207
Igf2r	7.06249	6.41237	1.87903	29.5961
Igsf3	0.002665	1.3438	0.115037	11.4246
Il10rb	14.9707	11.0005	8.3796	58.3489
Insc	0.021503	0.16826	0.023799	94.4146
Itga4	0	0	0	45.9697
Itpa	18.249	19.0295	20.898	106.496
Itpkb	0.877016	2.37335	2.00061	13.484
Itpr1	4.9514	6.5644	5.68651	29.8137
Jam3	0	0.011013	0	15.2473
Kctd12	0.003225	0	0	11.4176
Klf15	2.16298	0.216764	0.206101	12.7352
Klhl13	0	0	0	15.4642
Klhl23	0	0	0.416779	5.31205
Lama4	0.00783	0.010766	0	21.0502
Lbh	1.84022	6.18778	0.049331	192.264
Ldhb	0.015144	0.050456	0	132.659
Ldlrad3	0	5.9076	3.95519	21.666
Limch1	0.007298	0.004052	0	54.0432
Lpar5	0.841448	0.747605	0.015521	13.9608
Lpcat2	0.020931	1.69898	0	20.3721
Man1c1	0.087032	2.22831	0	8.13087
Map3k11	9.82973	6.36678	6.4083	34.4002
Mapk8ip1	0.943415	2.79521	0.375825	59.1621
Marcks	0	0.17104	1.63733	51.4625
Mboat2	0.007872	0.017497	0	11.5426
Mc1r	0.058666	0	0.017708	61.2075
Mcam	0	0.205149	0	122.089
Mcoln3	0.057055	0	0.012629	30.7377
Mdfi	0	0.59818	0	31.3254
Mef2c	0.003168	0	0.007103	13.9736
Megf6	0.309376	2.18347	0	9.73077
Meis2	0.528037	3.28511	5.56351	19.9018
Mest	0.425577	0.481732	0.117752	16.6223
Met	9.58453	62.4987	22.9912	230.065
Mgat4a	0.052118	0.69773	1.50524	17.1881
Mgat4b	21.4176	28.0022	21.2383	128.341
Mgat5	2.37231	5.30217	4.19446	48.3961
Mical1	1.20257	0.716385	0.012696	14.6023
Mical3	8.82109	9.59862	7.63584	63.1266
Mitf	0.655785	5.00948	4.0029	103.756
mKIAA1673	4.8462	2.01011	2.58378	21.4793
Mlana	0.084753	0	0.140701	1311.45
Mlph	17.8452	0	0.337527	139.022
Mns1	0.118922	4.57658	3.91241	39.3656
Morn4	0.19364	0.131419	0.083341	20.1569
Mpzl1	8.19336	10.4124	15.5233	110.333
Msrb2	0	0	0	10.9464
Mylk	2.61475	2.77618	3.00255	27.4087
Myo7a	3.69378	0.122494	0.256153	72.952
Nacc2	4.29428	6.37709	5.13156	21.3112
Naglu	15.6201	8.22292	8.2486	49.0954
Ncald	0.045697	0.038063	0	27.7478
Nckap5l	1.27984	2.45836	1.43873	54.2366
Nfatc2	0.077589	0.108875	0.023026	13.2987
Nipsnap1	7.41186	5.41824	0.020159	29.5648
Nme3	1.43406	3.9666	0.829592	12.1203
Nme4	0	5.4474	0	27.2056
Nppb	0.400731	0.027914	4.96225	30.5183
Nrcam	0	0.01027	0.040939	48.0071
Oca2	0	0	0	14.2854
Panx1	0	2.65038	0.011662	10.1462
Pax3	0	4.50949	1.63398	69.6332
Pcbp4	18.1233	27.2796	37.5673	129.381
Pcdhgb2	0.014068	0.44167	0.313358	38.3186
Pde11a	0	0	0	14.6765
Pdia4	85.804	68.9449	96.4361	333.386
Peg10	0	0.343708	0	18.7955
Pkia	0	0	0.005872	13.6883
Pla2g2e	1.16244	0.029319	3.99912	31.7276
Plagl1	0	0	0	111.222
Plekha8	4.39715	2.98387	1.86557	13.9744
Plxna1	22.1997	20.4728	16.1984	83.5387
Plxnb1	0.104493	1.81642	0.263977	18.5979
Pmel	0.302665	0.162976	0.091356	2473.23
Pop4	4.08735	8.5605	12.2709	46.6795
Ppargc1a	2.11102	0	0.903103	25.6977
Ppp1r9a	0	0.215519	0	10.0465
Ppt2	8.82494	19.7133	13.1547	65.7388
Prdm16	0	0	0.00296	23.181
Prickle1	9.39778	5.42654	0.481706	38.5624
Prkcq	0	0.007206	0.007181	54.9762
Prkg1	0	0	0	17.1578
Psen2	7.51793	4.93027	1.63417	77.7136
Ptgds	0.752303	0.107807	0.134292	202.657
Ptprm	0.061082	0	0	45.9948
Ptprs	16.4931	5.33357	20.8732	80.4501
Pvrl3	0.012727	1.32786	0	14.1314
Rab27a	4.53196	2.30138	0.01386	100.321
Rab38	0	4.48506	0.01371	318.708
Rap2b	4.11472	9.93049	12.2607	52.8307
Rapgef2	2.69696	8.88428	6.70269	68.6104
Rapgef4	0.102184	0.015883	0	26.994
Rasgrp3	0.799508	0.971607	0.111186	41.5403
Rnf130	0.083426	0	0	26.2088
Rpl29_3	1.08553	0.599132	0.743994	602.293
Rragd	0	0	0	14.4619
S100b	0.047045	0.039186	0	34.373
Sash1	2.23831	0.585974	0	16.0116
Scrn1	12.027	8.8152	14.7587	66.6054
Sdcbp	63.4441	73.2329	61.8835	281.254
Sema4c	3.11237	4.61985	5.52679	20.8757
Sfxn2	1.24185	2.05494	3.21129	14.218
Sgcb	0	0.91395	3.26607	14.1194
Sgce	0	11.6234	0	51.0668
Sgip1	0	0	0	14.5934
Shc4	0.402197	1.28629	2.01067	45.8113
Slc24a5	0.050079	0.018494	0.026382	351.987
Slc2a5	0.00631	0.021023	0.013967	15.6741
Slc38a1	4.43052	0.042264	0.556301	94.6201
Slc45a2	0.013098	0	0	385.58
Smpdl3a	0	0	0	27.2901
Snca	0	0	0	47.9838
Snhg6	5.3279	10.2883	7.4372	49.5824
Sntb1	0.009074	2.76114	0	13.3751
Sorbs1	4.8626	12.3391	10.8963	84.5073
Sort1	0.028717	0.312102	0.022405	65.8127
Sox10	0.042951	0	0	128.732
Sox11	0	0	0	20.3443
Sox6	0.002459	0	0.029934	17.0799
Sparcl1	0	0.006963	0.124897	51.8341
Spsb4	1.29393	0.097205	0	14.0037
Srp54a	7.33468	7.83175	5.52393	30.185
Sspn	4.55152	2.04755	6.36172	23.4058
Stard8	2.34318	0.007953	0.043564	11.9203
Stk39	3.50383	4.1326	0.0104	22.1663
Stox2	0	0	0	15.255
Sulf2	0.757352	0	1.44831	13.3645
Syne1	3.43965	4.9317	5.60937	21.3076
Syngr1	0	0.133889	0.00516	137.815
Syt4	0	0	2.89315	240.021
Syt9	0	0	0	13.9413
Szrd1	43.0078	40.5191	46.8037	143.252
Tacc1	5.81171	2.00737	2.49916	38.3528
Tbc1d16	0.111849	0.235963	0.012381	11.7112
Tbx2	0.016453	0	0.00607	28.5372
Tbx4	0	0	0	16.9707
Tcn2	0.379241	0.053465	0	38.8964
Tdrkh	0	1.70563	0	24.9648
Tecpr1	12.4193	3.3568	6.94836	131.112
Tgif2	0.375802	8.37534	1.23762	27.2704
Timp3	0.03756	0.866733	0.023094	11.1922
Tmc6	5.51808	5.07222	3.31314	28.7652
Tmc8	0.276289	0.113043	0.064364	11.9354
Tmem51	0.385709	0	0	37.4629
Tmem56	0	0.003486	0.003467	27.152
Tmod1	0.017879	0	0	13.1364
Tpd52l1	0	16.8037	0.029577	52.9022
Trf	0	0	0.018519	64.2844
Trim63	2.12625	0.017441	0	33.7809
Trpm1	0.072592	0.007072	0.063028	180.405
Tspan10	0.009465	0	0	157.559
Tspan12	0.070611	0	0	21.6293
Tspan13	0.010159	1.95186	0	16.0528
Tspan6	0	0	0	11.3614
Tspan7	0	0	0	10.5087
Ttyh3	1.06614	4.32246	2.39511	19.4988
Tuba1a	94.5583	114.497	125.159	422.453
Tubb3	0.192748	3.68947	6.1111	79.3469
Tyr	0	0.006561	0	232.648
Tyrp1	0	0	0	3811.88
Uba52	0	0	0	34.657
Ubash3b	0.457819	0.040141	0.033335	10.0579
Uchl1	0	0.022049	0	13.7698
Unc5c	0	0.002376	0.011995	30.0182
Vgll3	0	0.014383	0	80.9212
Vill	1.98047	0.871477	0.081794	60.7411
Wsb2	38.1297	43.1357	28.9619	145.145
Xlr3b	0	0	0	14.34
Xlr3c	0.050317	0	0	31.4034
Zcchc11	0.013543	2.73531	2.11367	19.1349
Zfp422	0	0.034275	0.027323	33.6928
